# Supplementary material
Source: publisher site journal article supplement (https://www.dovepress.com/article/279997)
Supplement: Supplementary file 1 [file get_supplementary_file.php]

## Supplementary materials

### Figure Legends

**Figure S1.** The blood expression levels of triglycerides (TG), total cholesterol (TC), high-density lipoprotein (HDL), low-density lipoprotein (LDL) in benign liver disease (BL), chronic hepatitis (CH), liver cirrhosis (LC), and hepatocellular carcinoma (HCC) groups. A, triglycerides (TG). B, total cholesterol (TC). C, high-density lipoprotein (HDL). D, low-density lipoprotein (LDL). \* indicates  $P < 0.05$ , \*\* indicates  $P < 0.01$

**Figure S2.** Overall survival curves in training cohort. A, ApoB. B, ApoE. C, triglycerides (TG). D, total cholesterol (TC). E, high-density lipoprotein (HDL). F, low-density lipoprotein (LDL).

**Figure S3.** Disease free survival curves in training cohort. A, ApoB. B, ApoE. C, triglycerides (TG). D, total cholesterol (TC). E, high-density lipoprotein (HDL). F, low-density lipoprotein (LDL).

**Figure S4.** Overall survival curves in validation cohort. A, ApoB. B, ApoE. C, triglycerides (TG). D, total cholesterol (TC). E, high-density lipoprotein (HDL). F, low-density lipoprotein (LDL).

**Figure S5.** Disease free survival curves in validation cohort. A, ApoB. B, ApoE. C, triglycerides (TG). D, total cholesterol (TC). E, high-density lipoprotein (HDL). F, low-density lipoprotein (LDL).

**Figure S6.** Prognostic significance of ApoA1 in patients with AFP concentration of  $\leq 400$  ng/mL in the training and validation cohorts. (A, B) HCC patients with a low ApoA1 have a poor OS (A) and short DFS (B) in training cohort. (C, D) HCC patients with a low ApoA1 have a poor OS (C) and short DFS (D) in validation cohort.

**Figure S7.** Early recurrence curves according to ApoA1  $\leq 1.23$ g/l or ApoA1  $> 1.23$ g/l in subgroups. (A) subgroup with an AFP concentration of  $\leq 400$   $\mu$ g/L in training cohort. (B) subgroup with an AFP concentration of  $\leq 400$   $\mu$ g/L in validation cohort. (C) subgroup with tumor size ranging from 2cm to 5cm in training cohort. (D) subgroup with an AFP concentration of  $\leq 400$   $\mu$ g/L in validation cohort. (E) subgroup of TNM stage I in training cohort. (F) subgroup of TNM stage I in validation cohort. (G) subgroup with solitary tumor in training cohort. (H) subgroup with solitary tumor in validation cohort.

**Figure S8.** Early recurrence curves according to ApoA1  $\leq 1.23\text{g/l}$  or ApoA1  $>1.23\text{g/l}$  in subgroups. (A) vascular invasion negative subgroup in training cohort. (B) vascular invasion negative subgroup in validation cohort.

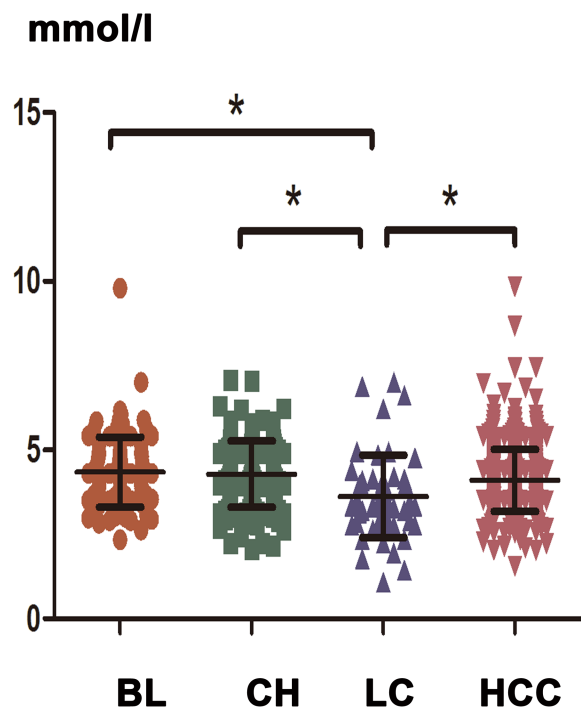

**A**

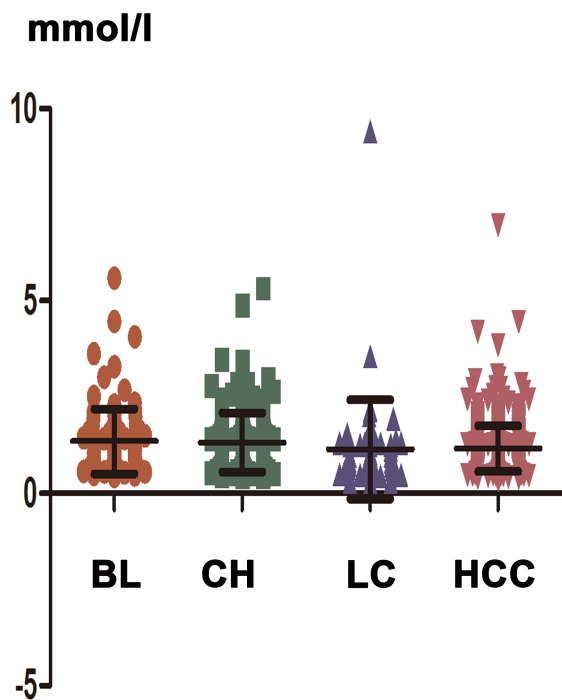

**B**

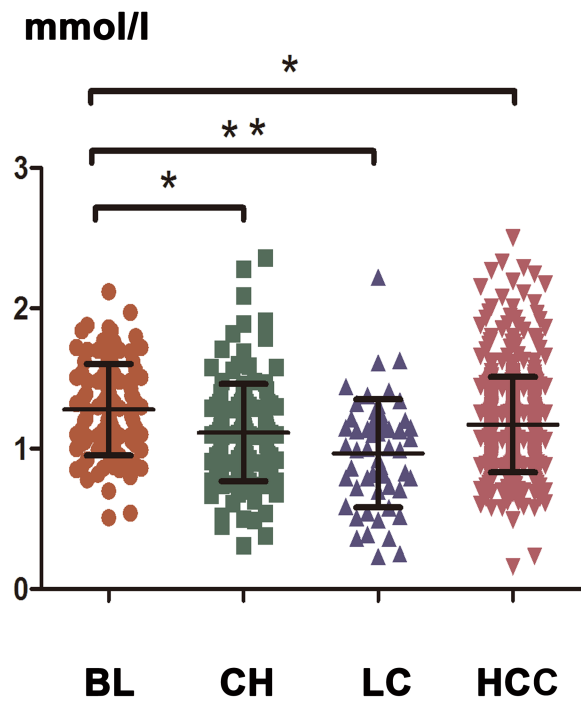

**C**

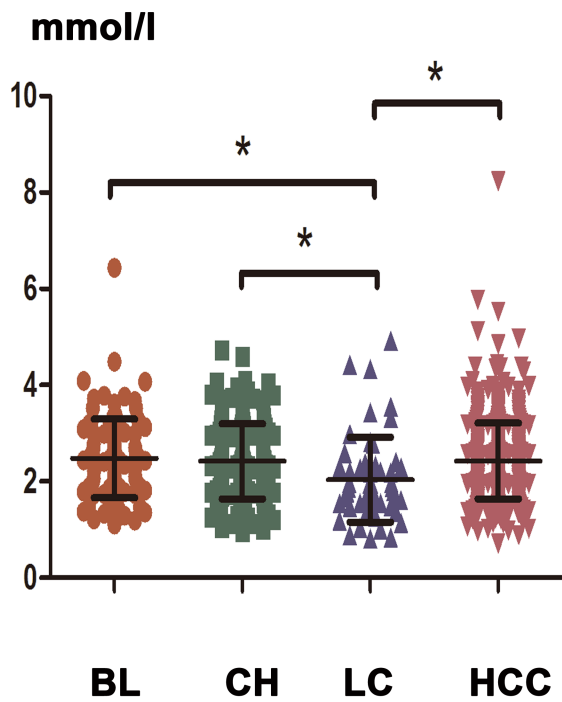

**D**

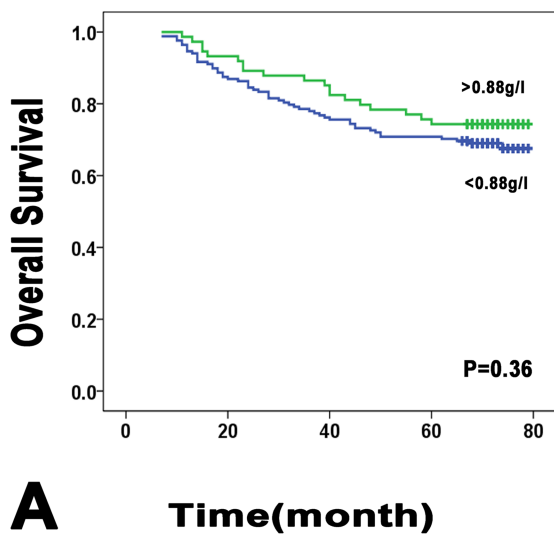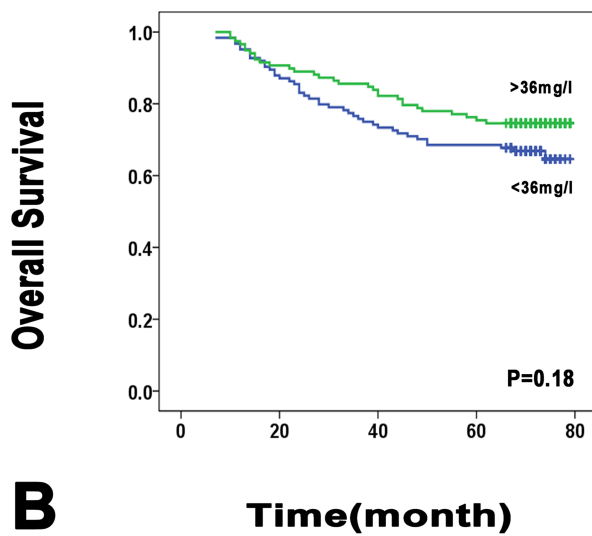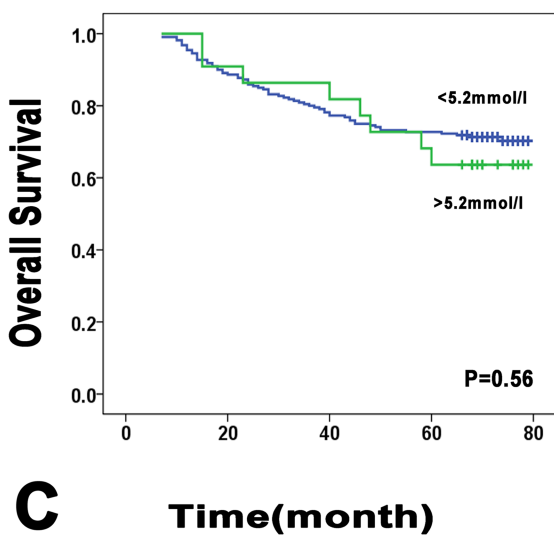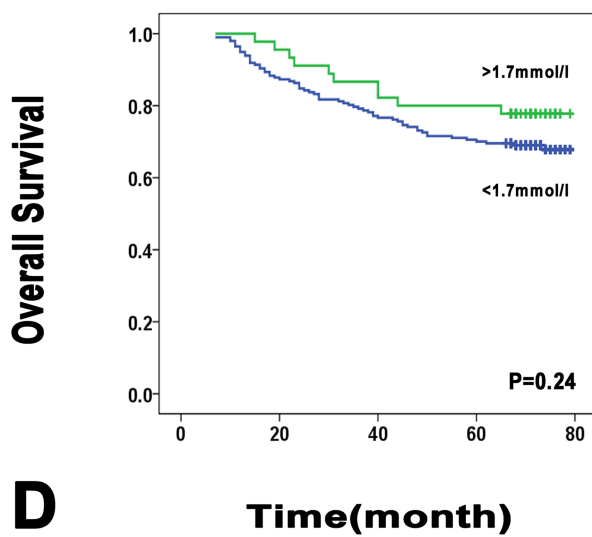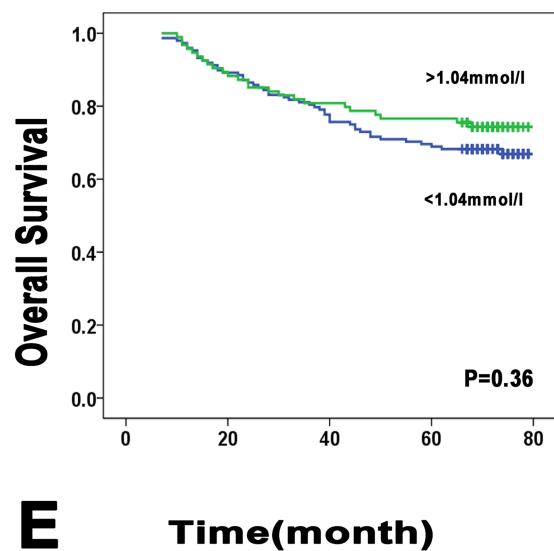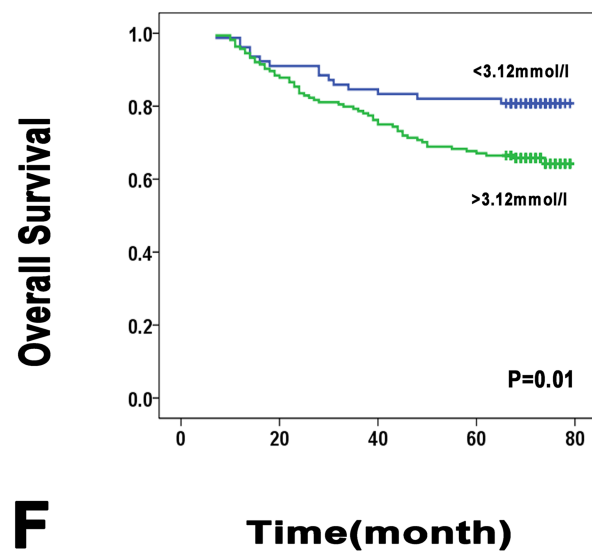

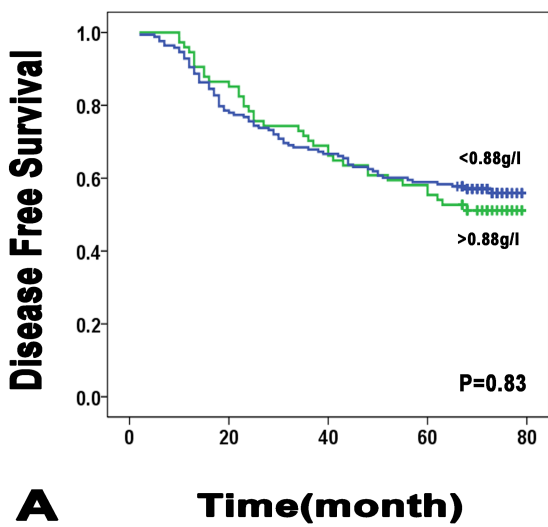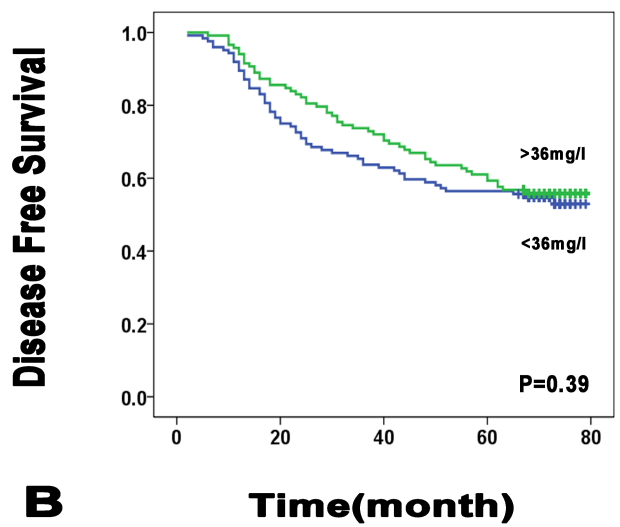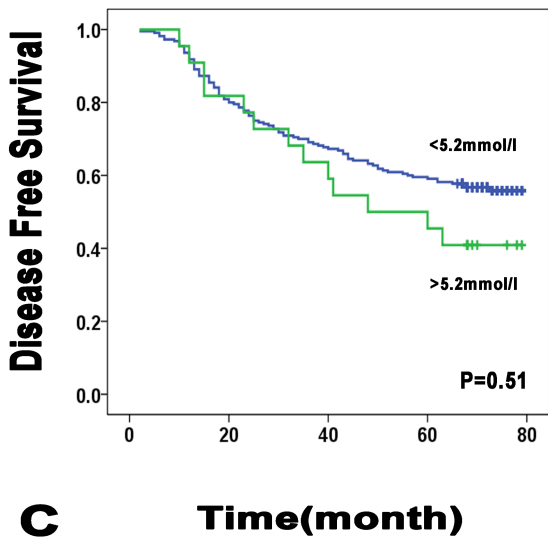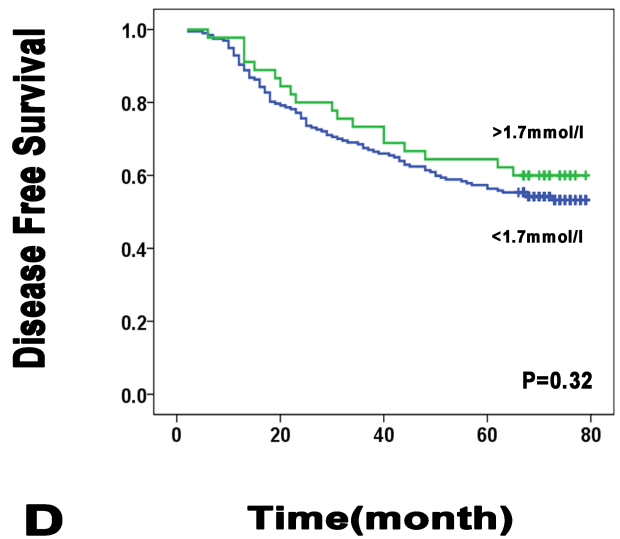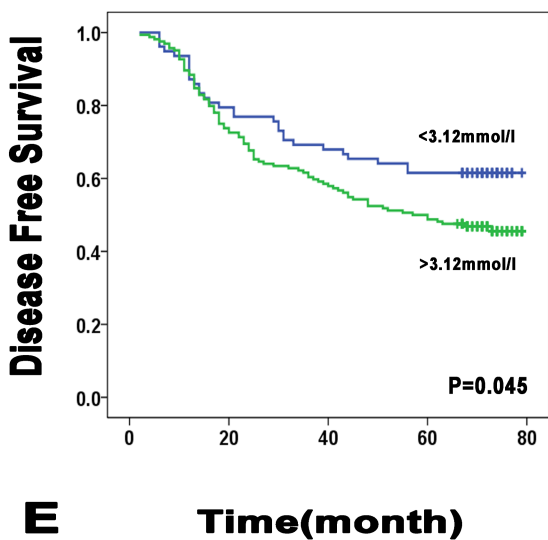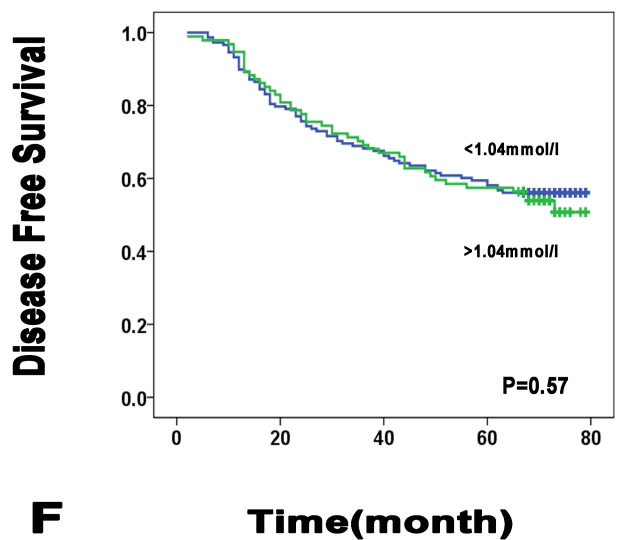

**Overall Survival**

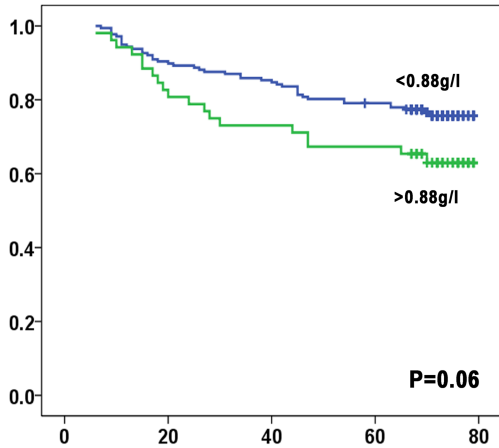

**A**

**Time(month)**

**Overall Survival**

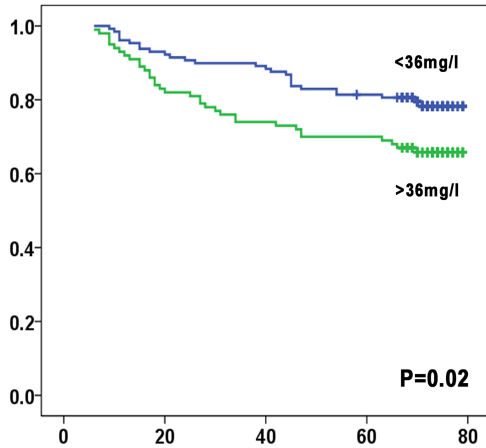

**B**

**Time(month)**

**Overall Survival**

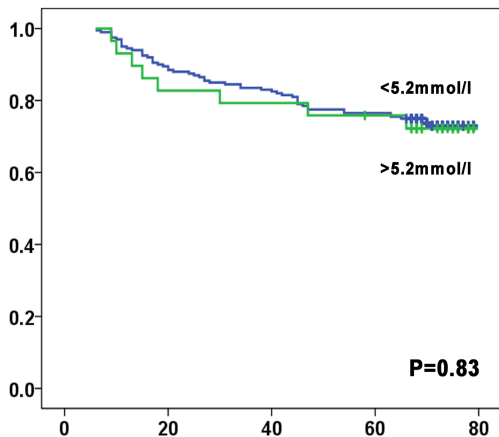

**C**

**Time(month)**

**Overall Survival**

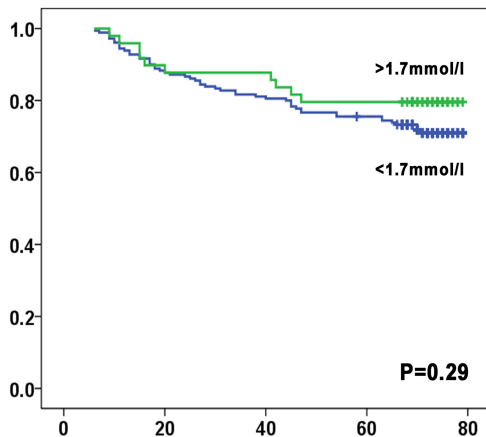

**D**

**Time(month)**

**Overall Survival**

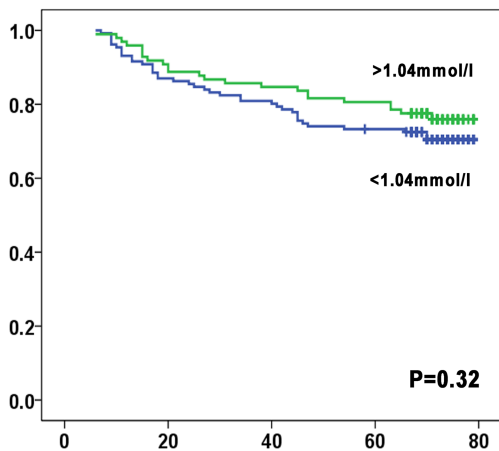

**E**

**Time(month)**

**Overall Survival**

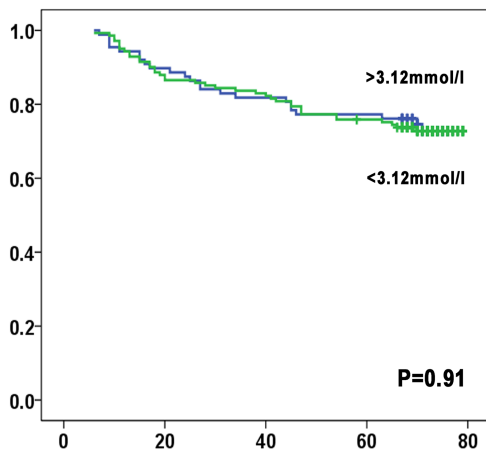

**F**

**Time(month)**

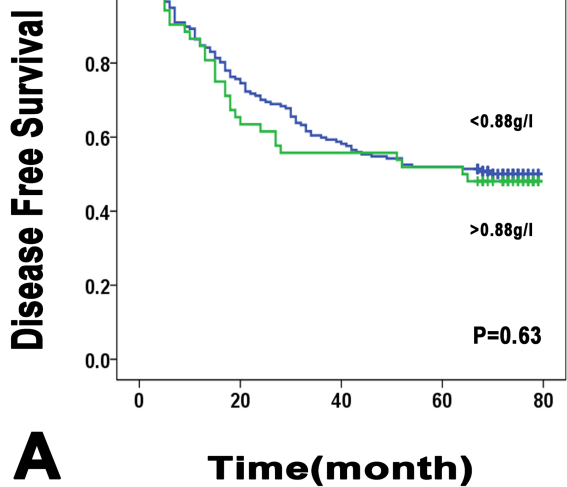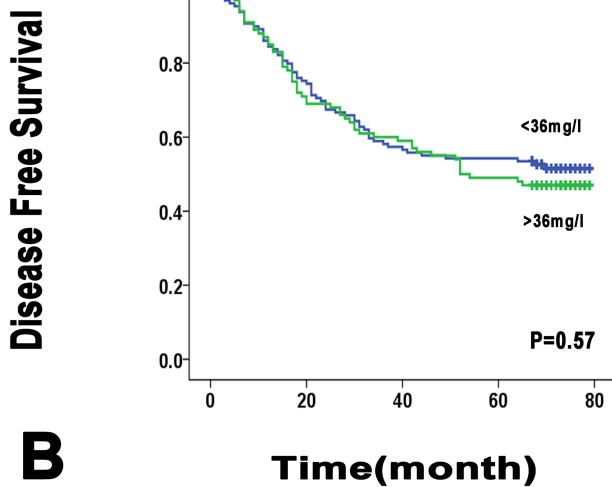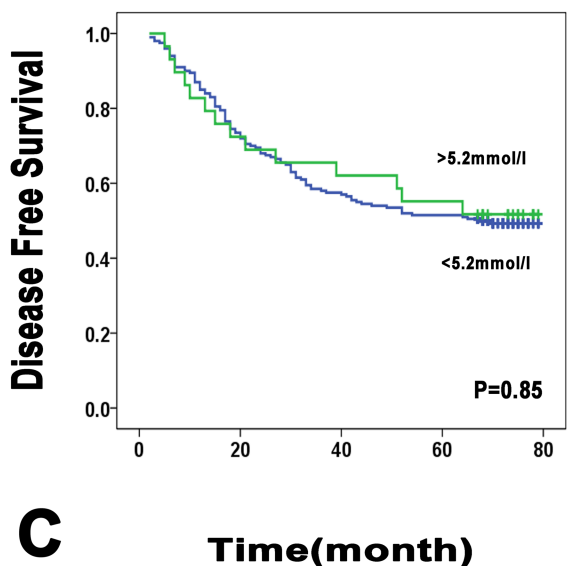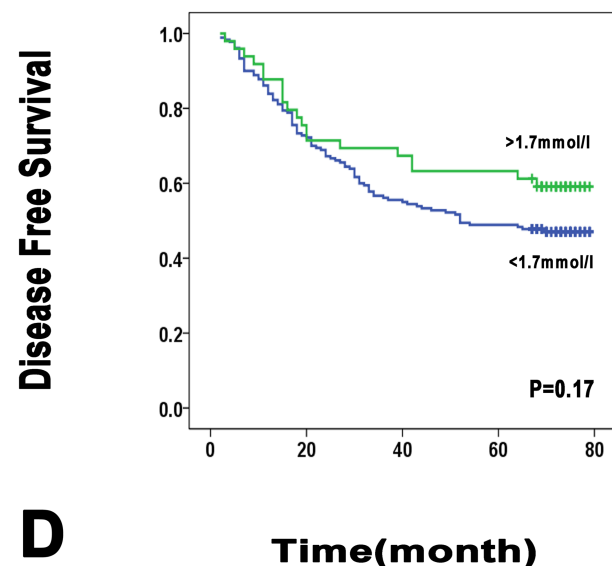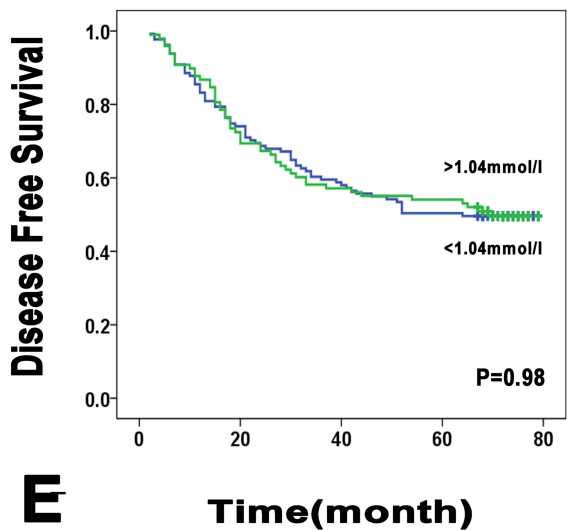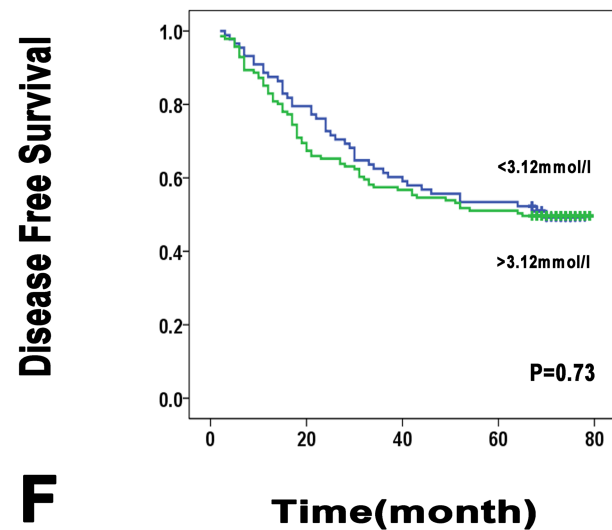

**Overall Survival**

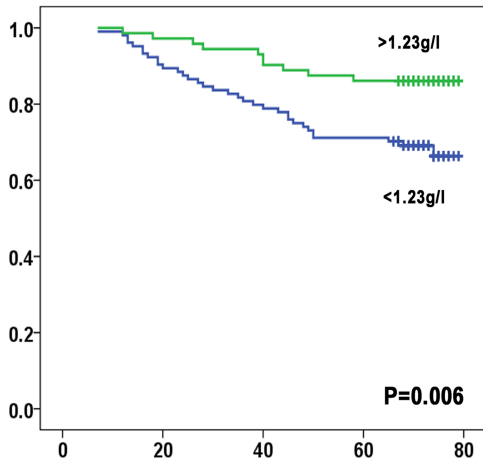

**A**

**Time(month)**

**Disease Free Survival**

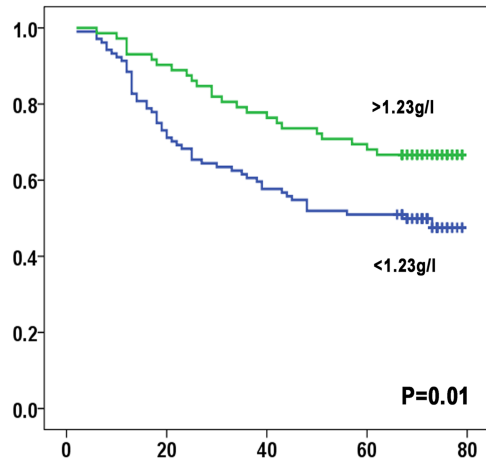

**B**

**Time(month)**

**Overall Survival**

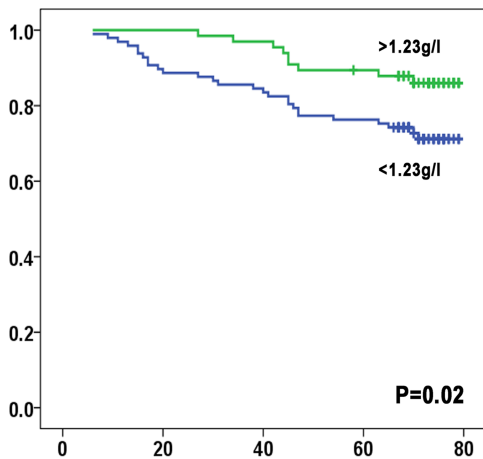

**C**

**Time(month)**

**Disease Free Survival**

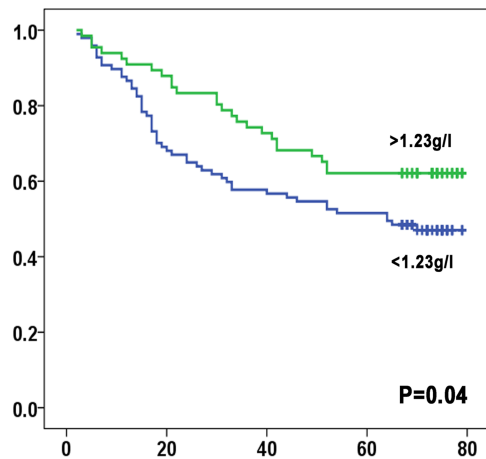

**D**

**Time(month)**



**Early Recurrence**

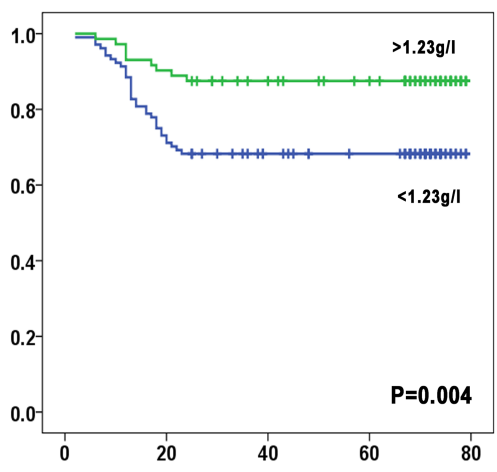

**A**

**Early Recurrence**

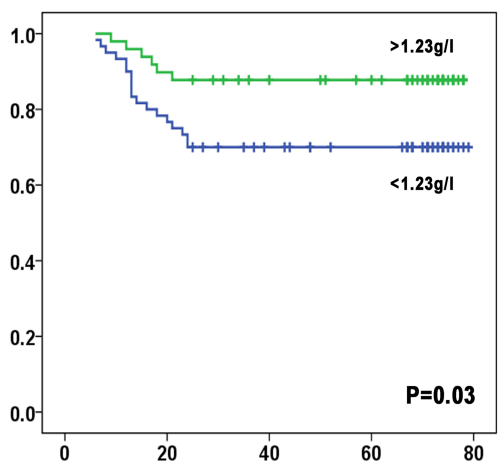

**B**

**Early Recurrence**

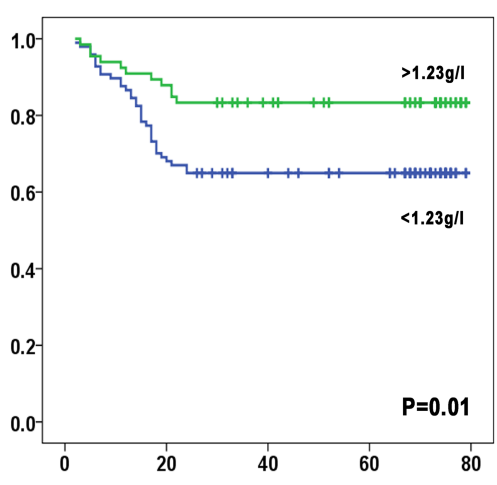

**C**

**Early Recurrence**

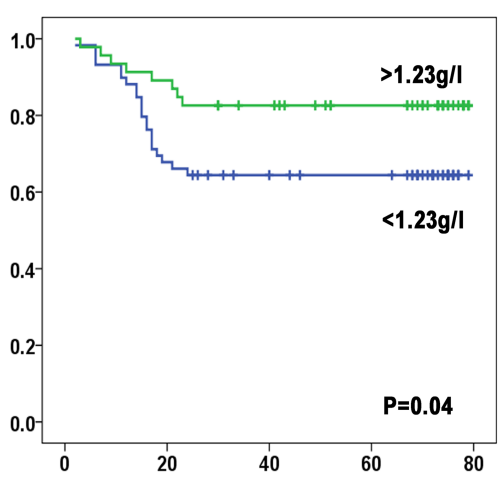

**D**

**Early Recurrence**

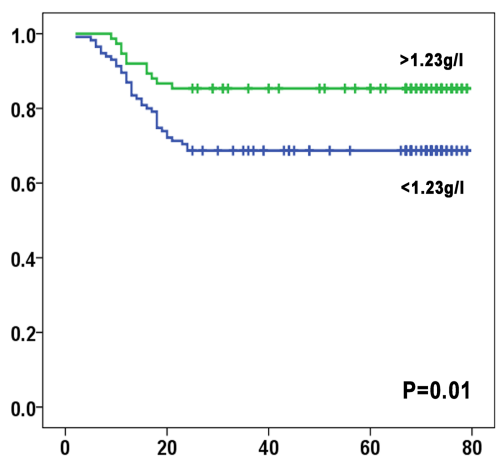

**E**

**Early Recurrence**

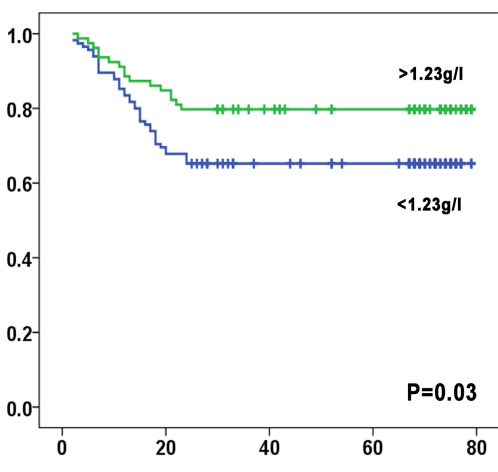

**F**

**Early Recurrence**

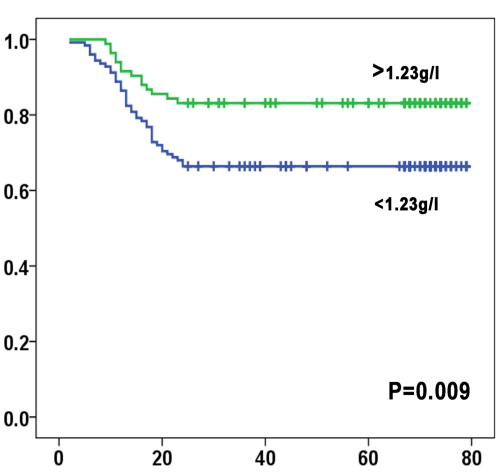

**G**

**Early Recurrence**

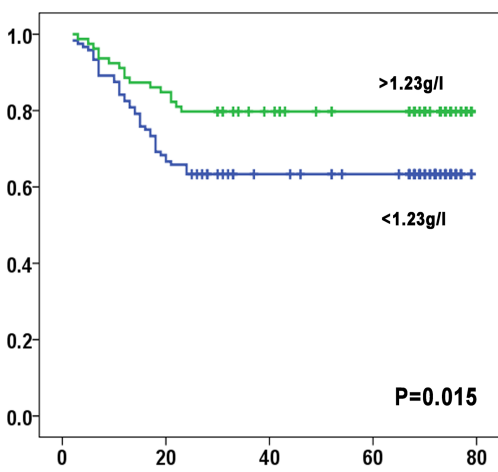

**H**

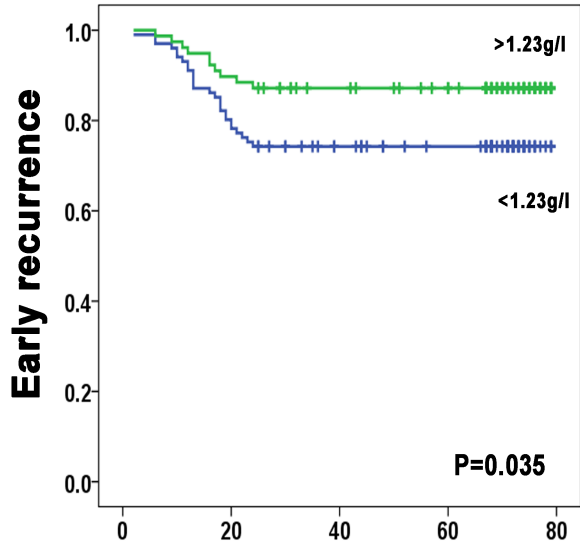

**A**

**Time(month)**

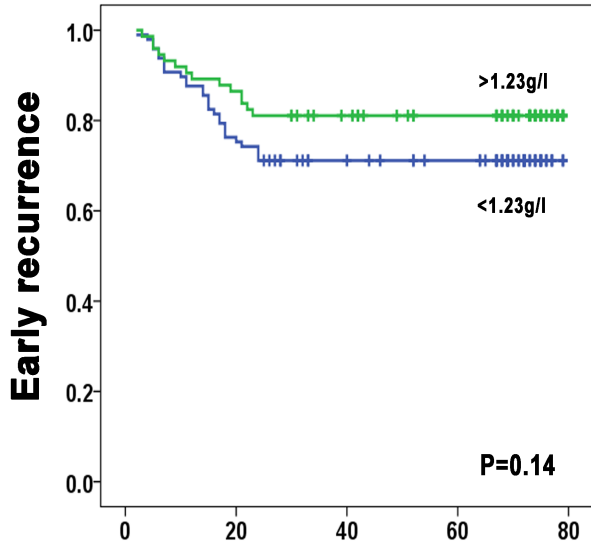

**B**

**Time(month)**

Table S1 Patient characteristics in the training and validation cohorts

| Variable                              | n=242            | n=229           | P    |
|---------------------------------------|------------------|-----------------|------|
| Age(yr),median(range)                 | 54(16-85)        | 55(26-78)       | 0.87 |
| Gender(Male/Female)                   | 209/33           | 189/40          | 0.26 |
| liver cirrhosis                       | 183/59           | 161/68          | 0.21 |
| Hepatitis history                     | 175/67           | 157/72          | 0.42 |
| BMI                                   | 23.6(15.6-32.4)  | 23.4(16.4-34.9) | 0.37 |
| GLU                                   | 5.2(3.8-13.9)    | 5.4(2.9-18)     | 0.28 |
| APLB                                  | 0.21(0.09-0.36)  | 0.22(0.1-0.44)  | 0.34 |
| ALT                                   | 37.3(7-131)      | 37.5(5-145)     | 0.9  |
| TB                                    | 12.6(1.7-36)     | 13.3(3.2-51.6)  | 0.22 |
| AFP                                   | 49.9(1.1-60500)  | 50.1(1.3-60500) | 0.88 |
| ALB                                   | 40.8(28-49)      | 41.1(31-52)     | 0.29 |
| GGT                                   | 75.1(10.2-587)   | 71.8(11-629)    | 0.64 |
| TNM                                   | 190/27/25        | 194/19/16       | 0.22 |
| Maximal tumour diameter (cm)          | 5.2(0.8-19)      | 4.6(0.8-18)     | 0.06 |
| Tumour number<br>(solitary/multiple)  | 208/34           | 199/30          | 0.79 |
| Tumour capsule(complete/none)         | 154/88           | 149/80          | 0.77 |
| Vascular invasion<br>(absent/present) | 229/13           | 222/7           | 0.26 |
| Edmondson grade (I-II/III-IV)         | 171/71           | 164/65          | 0.84 |
| CHOL                                  | 4.11(2.03-9.83)  | 4.09(1.56-8.67) | 0.82 |
| TG                                    | 1.2(0.4-6.97)    | 1.13(0.34-3.07) | 0.18 |
| HDL                                   | 1.17 (0.16-2.29) | 1.18 (0.58-2.5) | 0.73 |
| LDL                                   | 2.42(0.96-8.24)  | 2.43(0.71-5.77) | 0.97 |
| ApoA1                                 | 1.19(0.16-2.37)  | 1.19(0.69-2.22) | 0.89 |
| ApoB                                  | 0.82(0.36-6.8)   | 0.81(0.28-6.87) | 0.96 |
| ApoE                                  | 38.6(16-90)      | 38(1-94)        | 0.54 |

Abbreviations: BMI: body mass index; GLU: glucose; APLB: prealbumin; ALT: alanine aminotransferase; TB: total bilirubin; AFP: alpha-fetoprotein; ALB: prealbumin; GGT: glutamyl transpeptidase; HbA1C: hemoglobin A1C; CRP: C reactive protein; TC: total cholesterol; TG: triglycerides; HDL: high-density lipoprotein; LDL: low-density lipoprotein;

Table S2 Multivariate comparison of the prognostic power of TNM Stage in training cohort

|                 | OS                 |         | DFS                |         |
|-----------------|--------------------|---------|--------------------|---------|
|                 | HR(95%CI)          | P value | HR(95%CI)          | P value |
| ApoA1           | 0.517(0.309-0.866) | 0.01    | 0.537(0.363-0.793) | 0.002   |
| GGT             | 1.715(1.068-2.756) | 0.03    | 1.478(1.015-2.153) | 0.04    |
| AFP             | 1.97(1.208-3.213)  | 0.007   | 1.499(1.017-2.209) | 0.04    |
| LDL             | 1.969(1.086-3.569) | 0.03    | 1.498(0.978-2.297) | 0.06    |
| Edmondson grade |                    |         | 1.669(1.129-2.467) | 0.01    |
| TNM stage       | 1.508(1.105-2.059) | 0.01    | 1.457(1.135-1.871) | 0.001   |

Abbreviations: AFP: alpha-fetoprotein; GGT: glutamyl transpeptidase; LDL:low-density lipoprotein; OS: overall survival; DFS: disease free survival; HR: Hazard Ratio; CI: confidence interval.

Table S3 Univariate and multivariate analyses of prognostic factors in HCC in validation cohort

| Variables         | OS         |                    |      | DFS        |                    |      |
|-------------------|------------|--------------------|------|------------|--------------------|------|
|                   | Univariate | Multivariate       |      | Univariate | Multivariate       |      |
|                   | P          | HR (95% CI)        | P    | P          | HR (95% CI)        | P    |
| Gender            | 0.03       |                    |      | 0.005      |                    |      |
| Age(years)        | 0.51       |                    |      | 0.16       |                    |      |
| liver cirrhosis   | 0.48       |                    |      | 0.14       |                    |      |
| Hepatitis history | 0.19       |                    |      | 0.63       |                    |      |
| BMI               | 0.12       |                    |      | 0.29       |                    |      |
| GLU               | 0.1        |                    |      | 0.12       |                    |      |
| APLB              | 0.045      | 0.477(0.241-0.944) | 0.03 | 0.006      | 0.576(0.354-0.838) | 0.03 |
| ALT               | 0.22       |                    |      | 0.1        |                    |      |
| TB                | 0.83       |                    |      | 0.11       |                    |      |
| AFP               | 0.003      |                    |      | 0.03       |                    |      |
| ALB               | 0.89       |                    |      | 0.61       |                    |      |

|                   |        |                    |        |        |                    |       |
|-------------------|--------|--------------------|--------|--------|--------------------|-------|
| GGT               | <0.001 | 1.914(1.133-3.232) | 0.02   | 0.007  | 1.535(1.057-2.23)  | 0.02  |
| CHOL              | 0.83   |                    |        | 0.85   |                    |       |
| TG                | 0.29   |                    |        | 0.17   |                    |       |
| HDL               | 0.32   |                    |        | 0.98   |                    |       |
| LDL               | 0.91   |                    |        | 0.73   |                    |       |
| Tumor size        | <0.001 | 3.072(1.825-5.172) | <0.001 | 0.001  | 1.525(1.021-2.277) | 0.04  |
| Tumor number      | 0.02   |                    |        | 0.048  |                    |       |
| Tumor capsule     | 0.67   |                    |        | 0.37   |                    |       |
| Vascular invasion | <0.001 |                    |        | <0.001 | 1.735(1.148-2.622) | 0.009 |
| Edmondson grade   | 0.03   |                    |        | 0.14   |                    |       |
| TNM stage         | 0.001  |                    |        | 0.03   |                    |       |
| ApoA1             | 0.01   | 0.418(0.234-0.747) | 0.003  | 0.007  | 0.609(0.409-0.908) | 0.02  |
| ApoB              | 0.06   |                    |        | 0.63   |                    |       |
| ApoE              | 0.02   | 1.897(1.123-3.204) | 0.02   | 0.57   |                    |       |

---

Univariate analysis: Kaplan-Meier method; multivariate analysis: Cox proportional hazards regression model;

Abbreviations: BMI: body mass index; GLU: glucose; APLB: prealbumin; ALT: alanine aminotransferase; TB: total bilirubin; AFP: alpha-fetoprotein; ALB: prealbumin; GGT: glutamyl transpeptidase; HbA1C: hemoglobin A1C; CRP: C reactive protein; TC: total cholesterol; TG: triglycerides; HDL: high-density lipoprotein; LDL: low-density lipoprotein; OS: overall survival; DFS: disease free survival; HR: Hazard Ratio; CI: confidence interval.

Table S4 Multivariate comparison of the prognostic power of TNM Stage in validation cohort

|           | OS                 |         | DFS                |         |
|-----------|--------------------|---------|--------------------|---------|
|           | HR(95%CI)          | P value | HR(95%CI)          | P value |
| APLB      | 0.494(0.248-0.983) | 0.04    | 0.526(0.324-0.853) | 0.009   |
| AFP       | 1.755(1.037-2.97)  | 0.04    |                    |         |
| GGT       | 2.135(1.268-3.596) | 0.004   | 1.613(1.114-2.337) | 0.01    |
| ApoA1     | 0.421(0.234-0.755) | 0.004   | 0.585(0.394-0.868) | 0.008   |
| ApoE      | 1.939(1.136-3.31)  | 0.02    |                    |         |
| TNM stage | 1.443(1.012-2.031) | 0.04    | 1.319(0.989-1.759) | 0.06    |

Abbreviations: APLB: prealbumin; AFP: alpha-fetoprotein; GGT: glutamyl transpeptidase; OS: overall survival; DFS: disease free survival; HR: Hazard Ratio; CI: confidence interval.



Table S5 Multivariate comparison of the prognostic power of TNM Stage for early recurrence

|                 | early recurrence (training cohort) |         | early recurrence (validation cohort) |         |
|-----------------|------------------------------------|---------|--------------------------------------|---------|
|                 | HR(95%CI)                          | P value | HR(95%CI)                            | P value |
| Gender          |                                    |         | 2.479(0.975-6.302)                   | 0.057   |
| AFP             | 1.684(1.039-2.73)                  | 0.03    | 1.559(0.969-2.509)                   | 0.07    |
| GGT             | 1.681(1.045-2.703)                 | 0.03    | 2.215(1.392-3.526)                   | 0.001   |
| Edmondson grade | 1.924(1.192-3.107)                 | 0.007   |                                      |         |
| TNM stage       | 1.643(1.227-2.2)                   | 0.001   |                                      |         |
| ApoA1           | 0.35590.206-0.611)                 | <0.001  | 0.537(0.31-0.93)                     | 0.03    |

Abbreviations: AFP: alpha-fetoprotein; GGT: glutamyl transpeptidase; HR: Hazard Ratio; CI: confidence interval.
